# Supplementary material for: Peripheral immune cells in metastatic breast cancer patients display a systemic immunosuppressed signature consistent with chronic inflammation
Source: PubMed Central journal article supplement (PMC11039627; doi:10.1038/s41523-024-00638-2), 2024-04-23
Supplement: 41523_2024_638_MOESM1_ESM.pdf [file 41523_2024_638_MOESM1_ESM.pdf]

# Peripheral immune cells in metastatic breast cancer patients display a systemic immunosuppressed signature consistent with chronic inflammation

## SUPPLEMENTARY DATA

Supplementary Table 1 – Characteristics of breast cancer patients grouped based on previous treatments

|                                           | Chemo-CDK-       | Previous Chemo/CDK<br>(not last 3 months) | Chemo<br>(last 3 months) | CDK<br>(last 3 months) |
|-------------------------------------------|------------------|-------------------------------------------|--------------------------|------------------------|
|                                           | n=10             | n=40                                      | n=26                     | n=28                   |
| Age (years)                               | 57.5 (38.0-69.0) | 55.0 (48.0-61.5)                          | 53.0 (44.0-59.0)         | 53.0 (50.0-62.5)       |
| Sex                                       |                  |                                           |                          |                        |
| <i>Male</i>                               | 0 ( 0.0%)        | 1 ( 2.5%)                                 | 0 ( 0.0%)                | 0 ( 0.0%)              |
| <i>Female</i>                             | 10 (100.0%)      | 39 (97.5%)                                | 26 (100.0%)              | 28 (100.0%)            |
| Breast cancer subtype                     |                  |                                           |                          |                        |
| <i>Triple negative BC (TNBC)</i>          | 9 (90.0%)        | 22 (55.0%)                                | 16 (61.5%)               | 0 ( 0.0%)              |
| <i>HR+/HER2- BC (HR+BC)</i>               | 1 (10.0%)        | 18 (45.0%)                                | 10 (38.5%)               | 28 (100.0%)            |
| Denovo metastatic disease                 | 9 (90.0%)        | 3 ( 7.5%)                                 | 5 (19.2%)                | 8 (28.6%)              |
| Disease stage at sampling                 |                  |                                           |                          |                        |
| <i>Stage IV</i>                           | 10 (100.0%)      | 40 (100.0%)                               | 26 (100.0%)              | 28 (100.0%)            |
| Previous (neo)adjuvant chemotherapy       | 0 ( 0.0%)        | 37 (92.5%)                                | 20 (76.9%)               | 17 (60.7%)             |
| Previous Lines of metastatic chemotherapy |                  |                                           |                          |                        |
| <i>None</i>                               | 10 (100.0%)      | 31 (77.5%)                                | 0 ( 0.0%)                | 15 (53.6%)             |
| <i>1 line</i>                             | 0 ( 0.0%)        | 7 (17.5%)                                 | 26 (100.0%)              | 13 (46.4%)             |
| <i>2 lines</i>                            | 0 ( 0.0%)        | 2 ( 5.0%)                                 | 0 ( 0.0%)                | 0 ( 0.0%)              |
| Chemotherapy naive                        | 10 (100.0%)      | 0 ( 0.0%)                                 | 0 ( 0.0%)                | 7 (25.0%)              |
| Previous CDK4/6 inhibitor                 | 0 ( 0.0%)        | 16 (40.0%)                                | 11 (42.3%)               | 28 (100.0%)            |
| Previous adjuvant radiotherapy            | 0 ( 0.0%)        | 31 (77.5%)                                | 20 (76.9%)               | 23 (82.1%)             |
| Previous palliative radiotherapy          | 0 ( 0.0%)        | 8 (20.0%)                                 | 10 (38.5%)               | 12 (42.9%)             |
| Initial diagnosis to sampling (months)    | 1.1 (0.9-1.5)    | 63.4 (30.6-112.2)                         | 80.2 (32.9-120.6)        | 88.3 (38.0-144.9)      |
| Advanced diagnosis to sampling (months)   | 0.7 (0.2-1.1)    | 3.5 (1.0-24.7)                            | 19.9 (7.2-43.1)          | 24.2 (16.4-33.3)       |
| Bone metastases                           | 2 (20.0%)        | 28 (70.0%)                                | 15 (57.7%)               | 27 (96.4%)             |
| Liver metastases                          | 3 (30.0%)        | 23 (57.5%)                                | 14 (53.8%)               | 21 (75.0%)             |
| Lung metastases                           | 4 (40.0%)        | 16 (40.0%)                                | 7 (26.9%)                | 7 (25.0%)              |
| More than 3 sites of metastases           | 0 ( 0.0%)        | 9 (22.5%)                                 | 7 (26.9%)                | 6 (21.4%)              |

Data are presented as median (IQR) for continuous measures, and n (%) for categorical measures.

**Supplementary Table 2 – Characteristics of breast cancer patients included in flow cytometric analysis of tumors**

|                                           | All (n=63)        | TNBC (n=21)      | HR+BC (n=42)      |
|-------------------------------------------|-------------------|------------------|-------------------|
| Age (years)                               | 53.0 (49.0-62.0)  | 55.0 (43.0-59.0) | 52.5 (49.0-62.0)  |
| Sex                                       |                   |                  |                   |
| <i>Male</i>                               | 1 ( 2%)           | 0 ( 0%)          | 1 ( 2%)           |
| <i>Female</i>                             | 62 (98%)          | 21 (100%)        | 41 (98%)          |
| Breast cancer subtype                     |                   |                  |                   |
| <i>Triple negative BC (TNBC)</i>          | 21 (33%)          |                  |                   |
| <i>HR+/HER2- BC (HR+BC)</i>               | 42 (67%)          |                  |                   |
| Denovo metastatic disease                 | 14 (22%)          | 5 (24%)          | 9 (21%)           |
| Previous (neo)adjuvant chemotherapy       | 46 (73%)          | 16 (76%)         | 30 (71%)          |
| Previous Lines of metastatic chemotherapy |                   |                  |                   |
| <i>None</i>                               | 37 (59%)          | 15 (71%)         | 22 (52%)          |
| <i>1 line</i>                             | 25 (40%)          | 5 (24%)          | 20 (48%)          |
| <i>2 lines</i>                            | 1 ( 2%)           | 1 ( 5%)          | 0 ( 0%)           |
| Chemotherapy naive                        | 11 (17%)          | 4 (19%)          | 7 (17%)           |
| Previous CDK4/6 inhibitor                 | 41 (65%)          | 1 ( 5%)          | 40 (95%)          |
| Previous adjuvant radiotherapy            | 45 (71%)          | 12 (57%)         | 33 (79%)          |
| Previous palliative radiotherapy          | 21 (33%)          | 3 (14%)          | 18 (43%)          |
| Initial diagnosis to sampling (months)    | 73.4 (29.9-122.9) | 29.9 (21.5-88.6) | 83.3 (44.4-145.0) |
| Advanced diagnosis to sampling (months)   | 18.7 (3.0-32.8)   | 1.9 (0.7-6.2)    | 25.4 (17.5-37.5)  |
| Bone metastases                           | 48 (76%)          | 8 (38%)          | 40 (95%)          |
| Liver metastases                          | 38 (60%)          | 5 (24%)          | 33 (79%)          |
| Lung metastases                           | 19 (30%)          | 10 (48%)         | 9 (21%)           |
| More than 3 sites of metastases           | 15 (24%)          | 2 (10%)          | 13 (31%)          |

Data are presented as median (IQR) for continuous measures, and n (%) for categorical measures.

**Supplementary Table 3 - Association of peripheral blood immune cells with clinical benefit in ALICE trial (provided as excel file)**

**Supplementary Table 4 – Mass cytometry panel used in the study**

| <b>Antibody/Marker</b> | <b>Metal Tag</b>  | <b>Clone</b> | <b>Manufacturer</b>        |
|------------------------|-------------------|--------------|----------------------------|
| CD45 (Barcode)         | 89Y               | HI30         | Standard BioTools, CA, USA |
| CD45 (Barcode)         | 104Pd             | HI30         | Biolegend, CA, USA         |
| CD45 (Barcode)         | 106Pd             | HI30         | Biolegend, CA, USA         |
| CD45 (Barcode)         | 108Pd             | HI30         | Biolegend, CA, USA         |
| CD45 (Barcode)         | 110Pd             | HI30         | Biolegend, CA, USA         |
| CD45 (Barcode)         | In-115            | HI30         | Biolegend, CA, USA         |
| CCR6                   | 141Pr             | G034E3       | Standard BioTools, CA, USA |
| CD19                   | 142 <sup>Nd</sup> | HIB19        | Standard BioTools, CA, USA |
| CD45RA                 | 143Nd             | HI100        | Standard BioTools, CA, USA |
| CD38                   | 144Nd             | HIT2         | Standard BioTools, CA, USA |
| CD163                  | 145Nd             | GHI/61       | Standard BioTools, CA, USA |
| IgD                    | 146Nd             | IA6-2        | Standard BioTools, CA, USA |
| CD303 (BDCA2)          | 147Sm             | 201A         | Standard BioTools, CA, USA |
| CD14                   | 148Nd             | RMO52        | Standard BioTools, CA, USA |
| CD25                   | 149Sm             | 2A3          | Standard BioTools, CA, USA |
| KIR2D                  | 150Nd             | NKVFS1       | Miltenyi Biotec, Germany   |
| KIR3DL1/2              | 150Nd             | 5.133        | Miltenyi Biotec, Germany   |
| ICOS                   | 151Eu             | C398.4A      | Standard BioTools, CA, USA |
| TCRgd                  | 152Sm             | 11F2         | Standard BioTools, CA, USA |
| TIM3                   | 153Gd             | F38-2E2      | Standard BioTools, CA, USA |
| TIGIT                  | 154Eu             | MBSA43       | Standard BioTools, CA, USA |
| PD1                    | 155Gd             | EH12.2H7     | Standard BioTools, CA, USA |
| CXCR3                  | 156Gd             | G025H7       | Standard BioTools, CA, USA |
| CCR4                   | 158Eu             | 205410       | Standard BioTools, CA, USA |
| CCR7                   | 159Tb             | G043H7       | Standard BioTools, CA, USA |
| CD39                   | 160Gd             | A1           | Standard BioTools, CA, USA |
| Ki67                   | 161Dy             | B56          | Standard BioTools, CA, USA |
| CD11c                  | 162Dy             | Bu15         | Standard BioTools, CA, USA |
| CD33                   | 163Dy             | WM53         | Standard BioTools, CA, USA |
| CD161                  | 164Dy             | HP-3G10      | Standard BioTools, CA, USA |
| CD127                  | 165Ho             | A019D5       | Standard BioTools, CA, USA |
| CD15s                  | 166Er             | CSLEX1       | BD biosciences             |
| CD27                   | 167Er             | O323         | Standard BioTools, CA, USA |
| CD8                    | 168Er             | SK1          | Standard BioTools, CA, USA |
| NKG2A                  | 169Tm             | Z199         | Standard BioTools, CA, USA |
| CD3                    | 170Er             | UCHT1        | Standard BioTools, CA, USA |
| Granzyme-B             | 171Yb             | GB11         | Standard BioTools, CA, USA |
| CD57                   | 172Yb             | HCD57        | Standard BioTools, CA, USA |
| HLA-DR                 | 173Yb             | L243         | Standard BioTools, CA, USA |
| CD4                    | 174Yb             | SK3          | Standard BioTools, CA, USA |
| PDL1                   | 175Lu             | 29E.2A3      | Standard BioTools, CA, USA |
| CD56                   | 176Yb             | N901         | Standard BioTools, CA, USA |
| CD16                   | 209Bi             | 3G8          | Standard BioTools, CA, USA |
| Intercalator-Ir        | 191/193           | -            | Standard BioTools, CA, USA |
| Cisplatin-194Pt        | 194               | -            | Standard BioTools, CA, USA |

**Supplementary Table 5 - Nominal and FDR-adjusted p-values reported in the manuscript (HD vs. BC patients comparison)** (provided as excel file)

**Supplementary Table 6 - Nominal and FDR-adjusted p-values reported in the manuscript (HR+BC vs. TNBC comparison)** (provided as excel file)

**Supplementary Table 7 - Nominal and FDR-adjusted p-values reported in the manuscript (HD vs. Treatment groups comparison)** (provided as excel file)

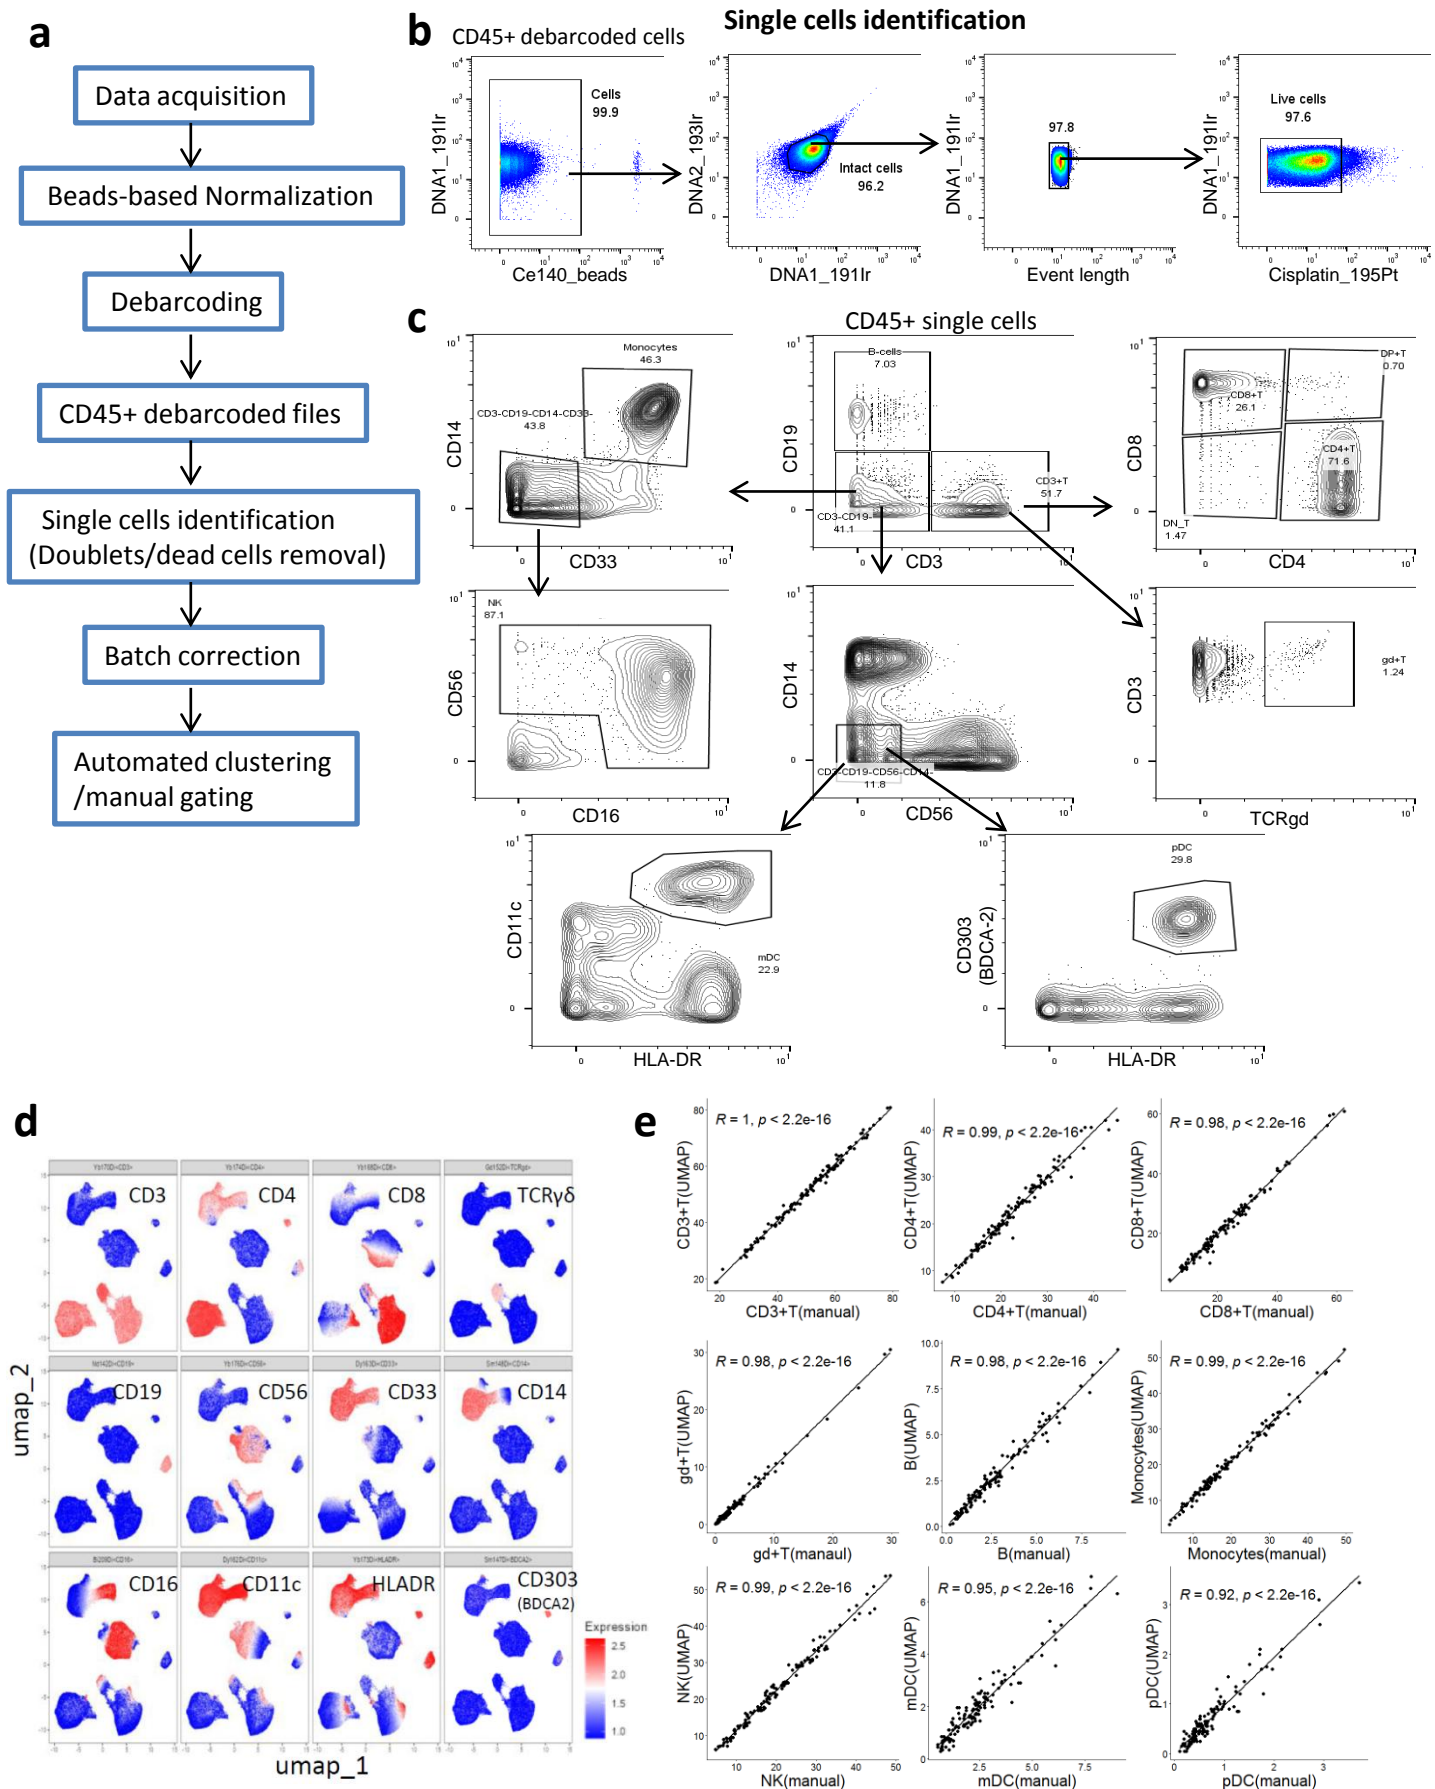

**Supplementary Figure 1. (a)** General scheme of pre-processing of CyTOF data. **(b)** Identification of single cells from debarcoded files. **(c)** Manual gating strategy used for identification of different immune subsets in PBMCs of BC patients and HD by CyTOF. **(d)** Expression of core phenotypic markers on UMAP. **(e)** Correlation between major immune subsets estimated by UMAP-phenograph guided approach and manual gating. Spearman rank correlation. p-value  $< 0.05$  was considered statistically significant. *Abbreviations:* T, T cells; B, B cells; NK, Natural Killer cells; mDC, myeloid dendritic cells; pDC, plasmacytoid dendritic cells

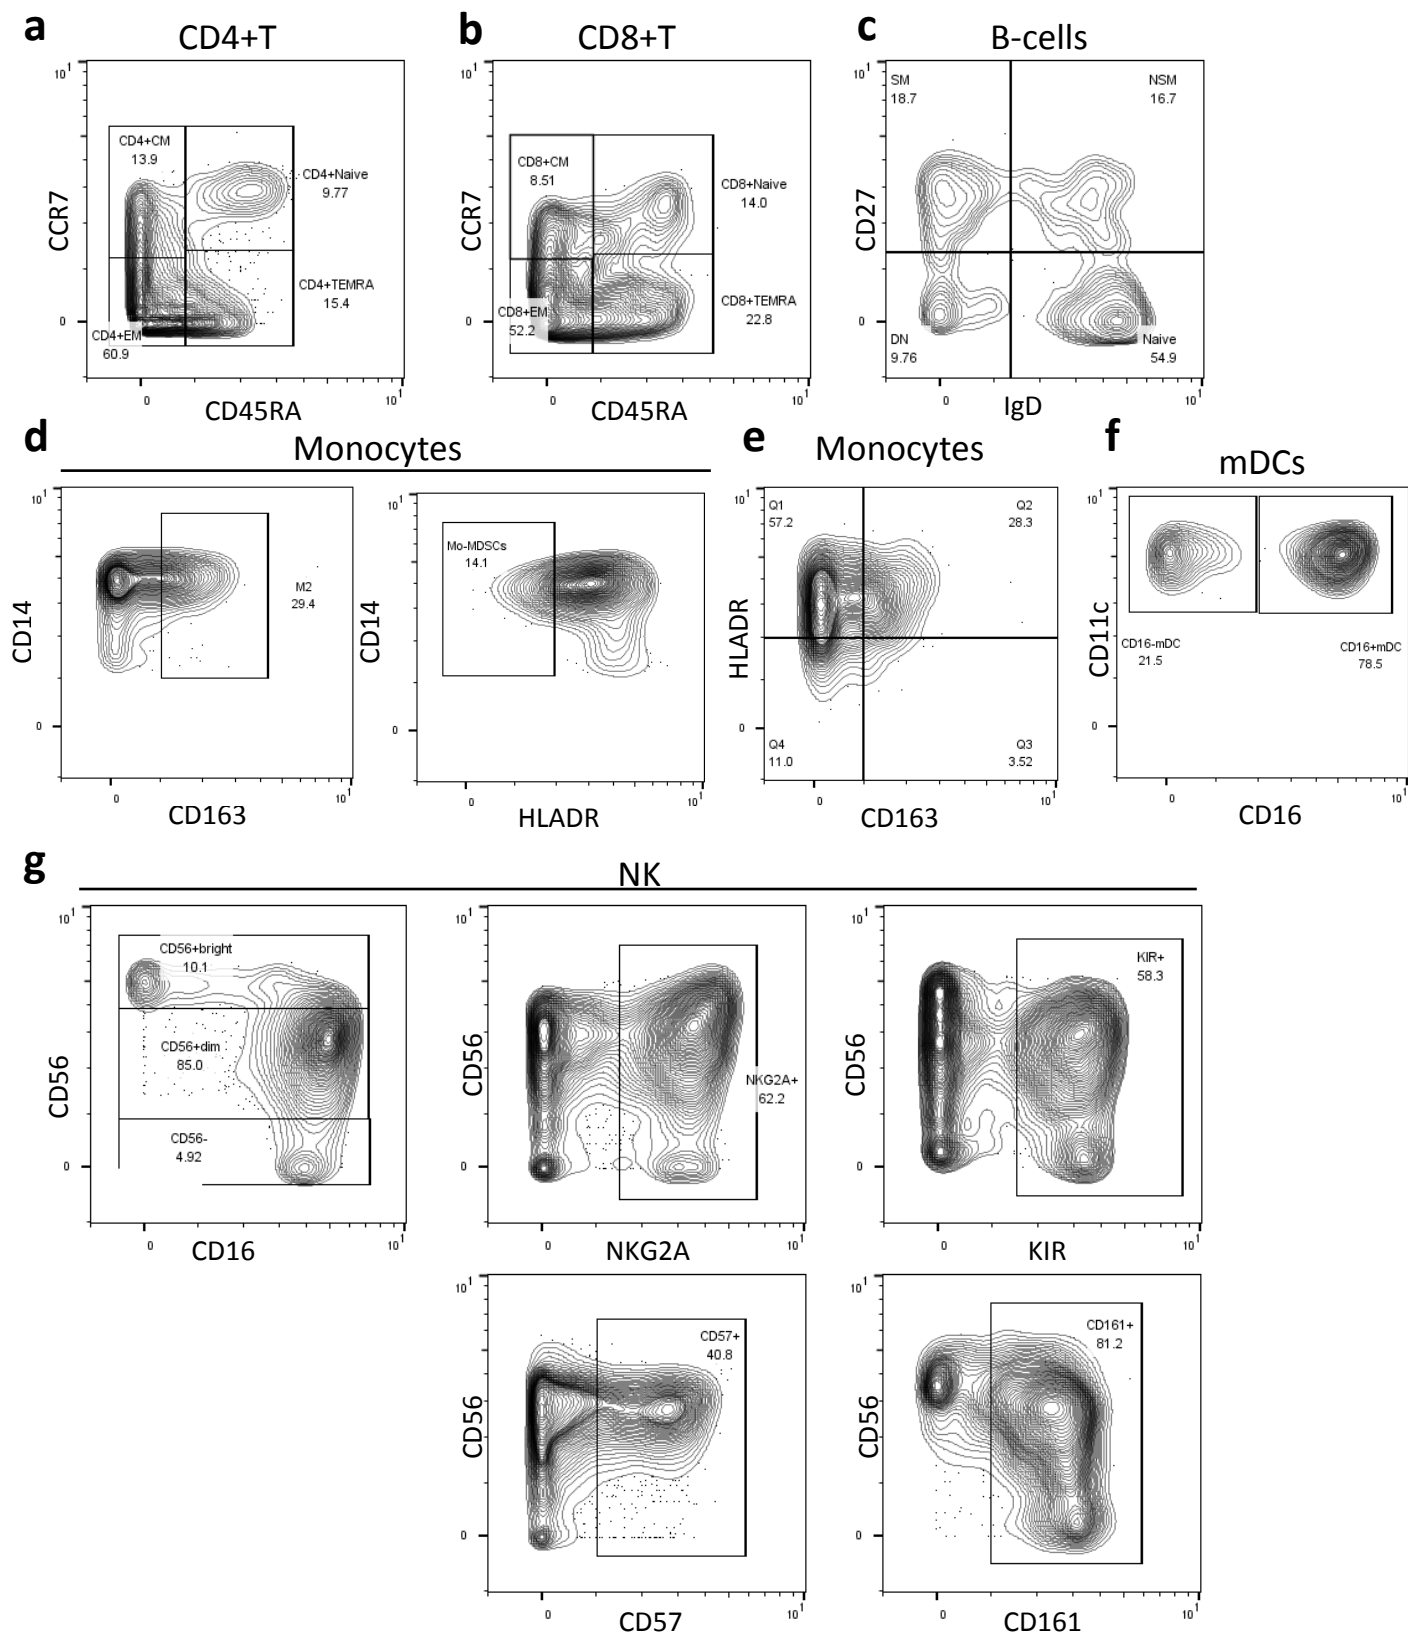

**Supplementary Figure 2.** Gating scheme for identifying the immune cell subsets corresponding to figure 2. **(a-b)** CD4 and CD8 T cells were divided into 4 subsets (Naive, CM, EM, and TEMRA) based on expression of CD45RA and CCR7. **(c)** B-cells were divided into 4 subsets (Naive, DN, SM, and NSM) based on expression of IgD and CD27. **(d)** Monocytes were classified as M2 (CD4+CD163+) and Mo-MDSCs (CD14+HLADR-). **(e)** FACS Plot showing co-expression of CD163 and HLADR on monocytes. **(f)** mDCs were grouped into 2 subsets (CD16- and CD16+ mDCs) based on CD16 expression. **(g)** NK cells were grouped into CD56bright, CD56dim and CD56- subsets based on CD56 and CD16 expression. Additionally NKG2A+, KIR+, CD57+ and CD161+ NK cells were gated from total NK cells. *Abbreviations:* CM, central memory; EM, effector memory; TEMRA, effector memory re-expressing CD45RA; SM, switched memory; NSM, non-switched memory; DN, double negative; Mo-MDSCs, Monocytic myeloid derived suppressor cells

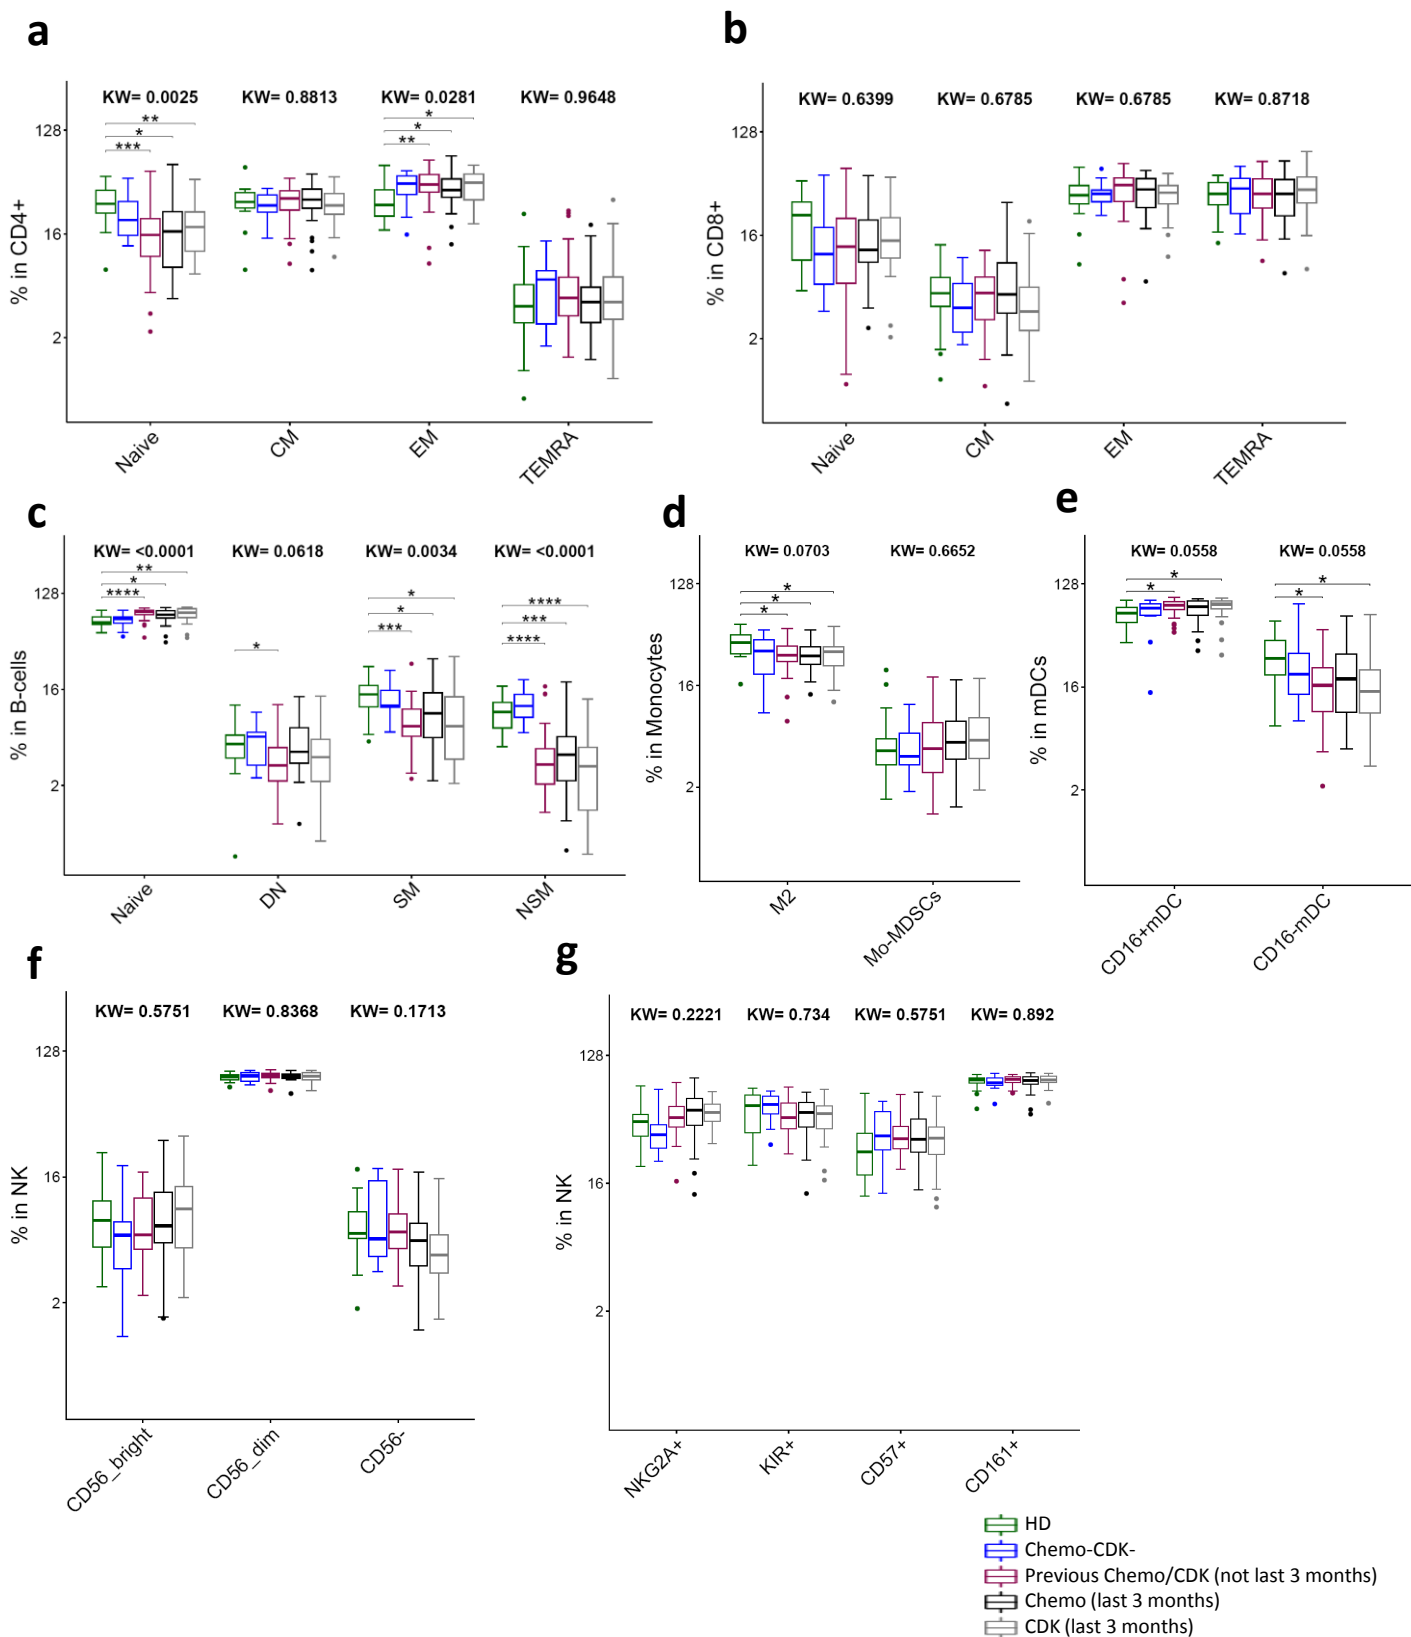

**Supplementary Figure 3.** Effect of previous chemotherapy and CDK inhibitors on differentiation subsets of immune cells in BC patients. **(a)** CD4+T **(b)** CD8+T **(c)** B-cells **(d)** Monocytes **(e)** mDCs **(f-g)** NK cells. Received no chemotherapy/CDK inhibitors (Chemo-CDK-; n=10), received chemotherapy/CDK inhibitors >3 months before sample collection [Previous Chemo/CDK (not last 3 months); n=40], received chemotherapy within 3 months before sample collection [Chemo (last 3 months); n=26], received CDK inhibitors within 3 months before sample collection [CDK (last 3 months); n=28]. Groups were compared by kruskal wallis test, followed by pair-wise comparisons using Wilcoxon Mann-Whitney Rank Sum Test with HD as a reference group. FDR-adjusted p-value (p.adj) < 0.05 was considered statistically significant. . \*p.adj<0.05, \*\*p.adj<0.01, \*\*\*p.adj<0.001, \*\*\*\*p.adj<0.0001.

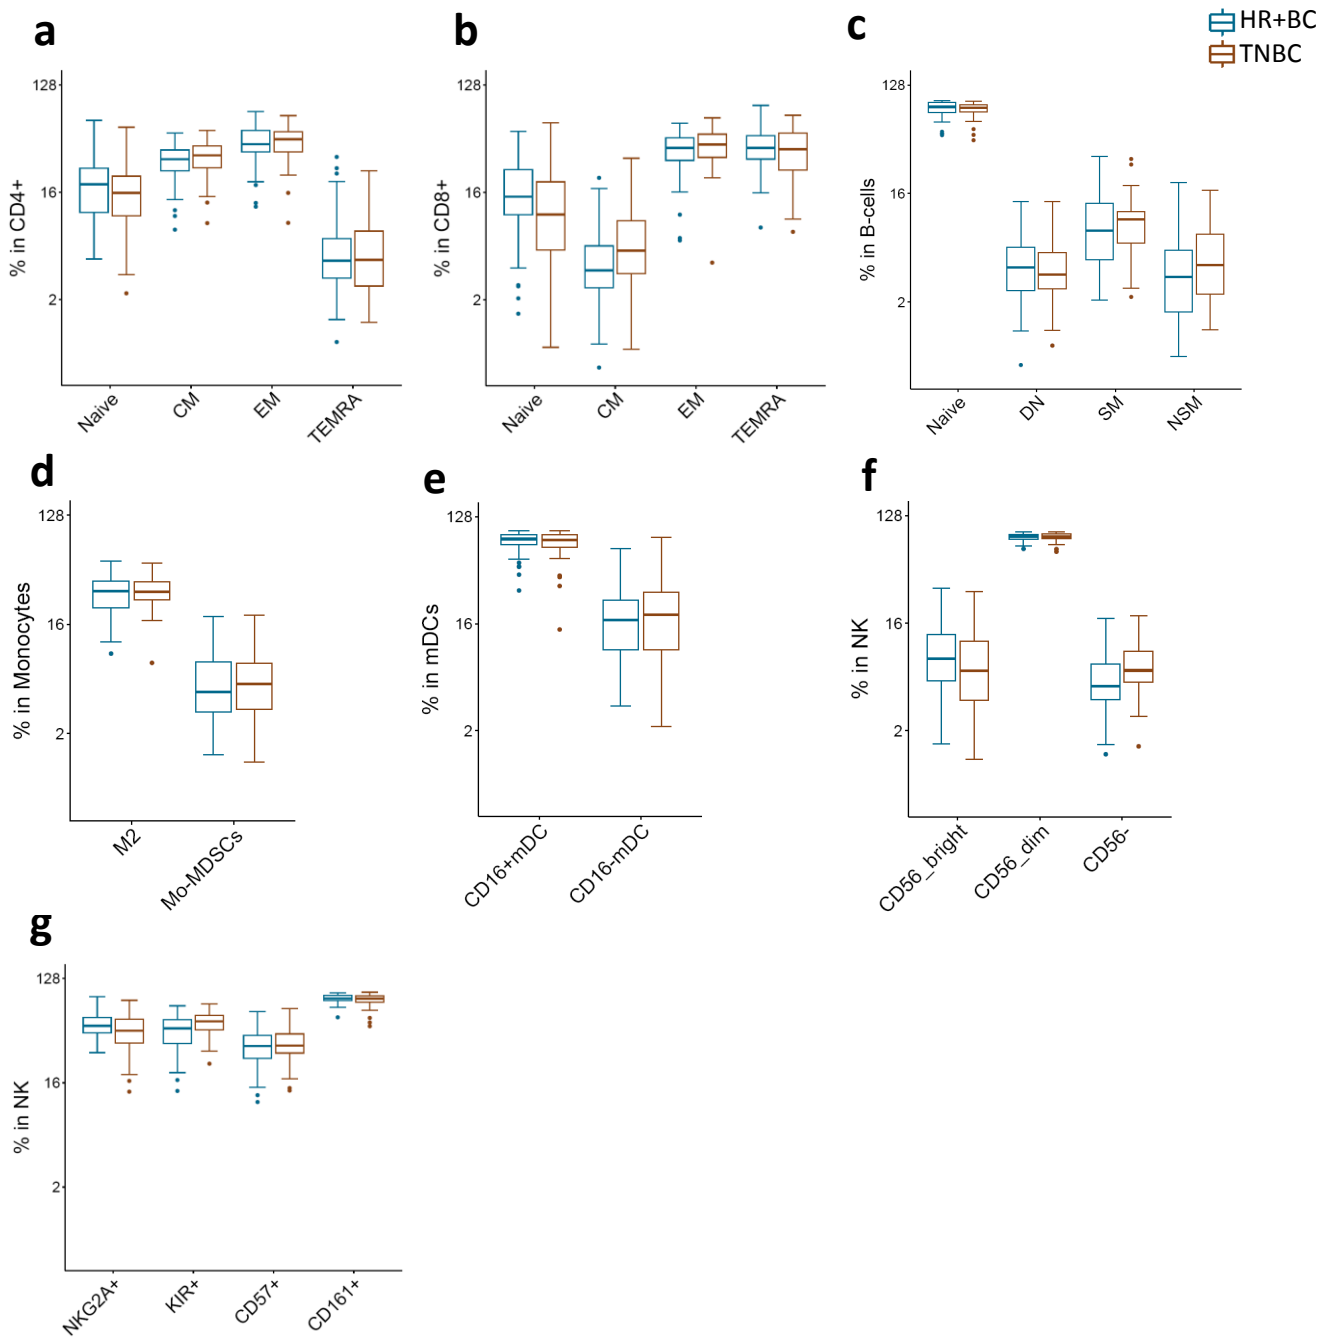

**Supplementary Figure 4.** Abundance of differentiation subsets of immune cells between HR+BC and TNBC patients. **(a)** CD4+T **(b)** CD8+T **(c)** B-cells **(d)** Monocytes **(e)** mDCs **(f-g)** NK cells. Groups were compared by Wilcoxon Mann-Whitney Rank Sum Test. FDR-adjusted p-value ( $p_{adj}$ ) < 0.05 was considered statistically significant. \* $p_{adj}$ <0.05. HR+BC: n=57. TNBC: n=47.



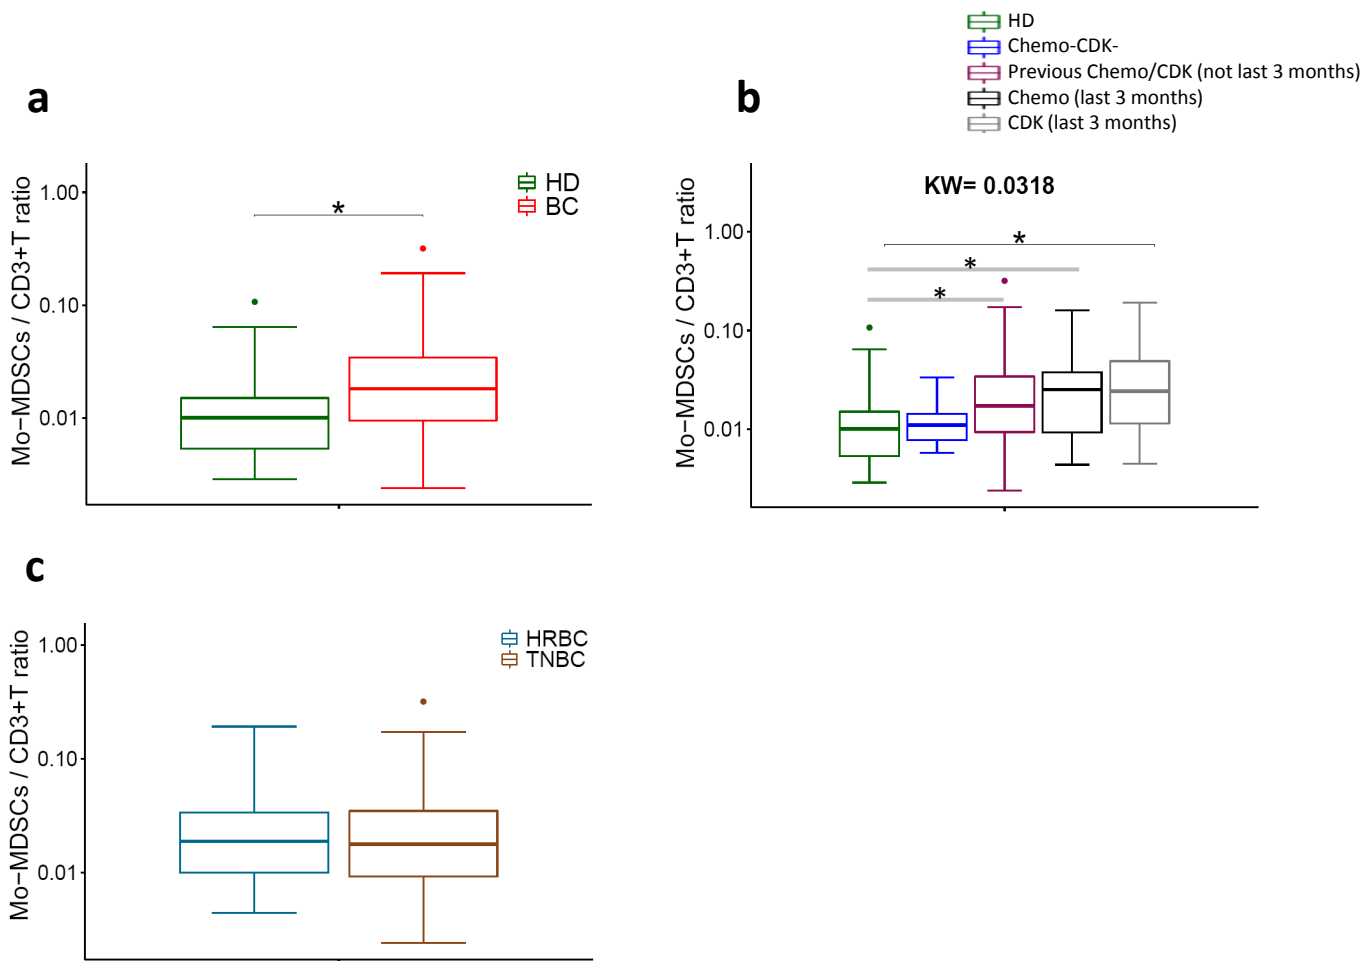

**Supplementary Figure 5.** Comparison of Mo-MDSCs/CD3+T cells ratio. **(a)** Mo-MDSCs to CD3+T cells ratio between HD (n=20) and BC patients (n=104). Wilcoxon Mann-Whitney Rank Sum Test; \*p<0.05 **(b)** Effect of previous chemotherapy and CDK inhibitors on Mo-MDSCs to CD3+T cells ratio. Received no chemotherapy/CDK inhibitors (Chemo-CDK-; n=10), received chemotherapy/CDK inhibitors >3 months before sample collection [Previous Chemo/CDK (not last 3 months); n=40], received chemotherapy within 3 months before sample collection [Chemo (last 3 months); n=26], received CDK inhibitors within 3 months before sample collection [CDK (last 3 months); n=28]. **(c)** Mo-MDSCs to CD3+T cells ratio between HRBC (n=57) and TNBC patients (n=47). Kruskal wallis test, followed by pair-wise comparisons using Wilcoxon Mann-Whitney Rank Sum Test with HD as a reference group. FDR-adjusted p-value (p.adj) < 0.05 was considered statistically significant. \*p.adj<0.05, \*\*p.adj<0.01, \*\*\*p.adj<0.001, \*\*\*\*p.adj<0.0001.

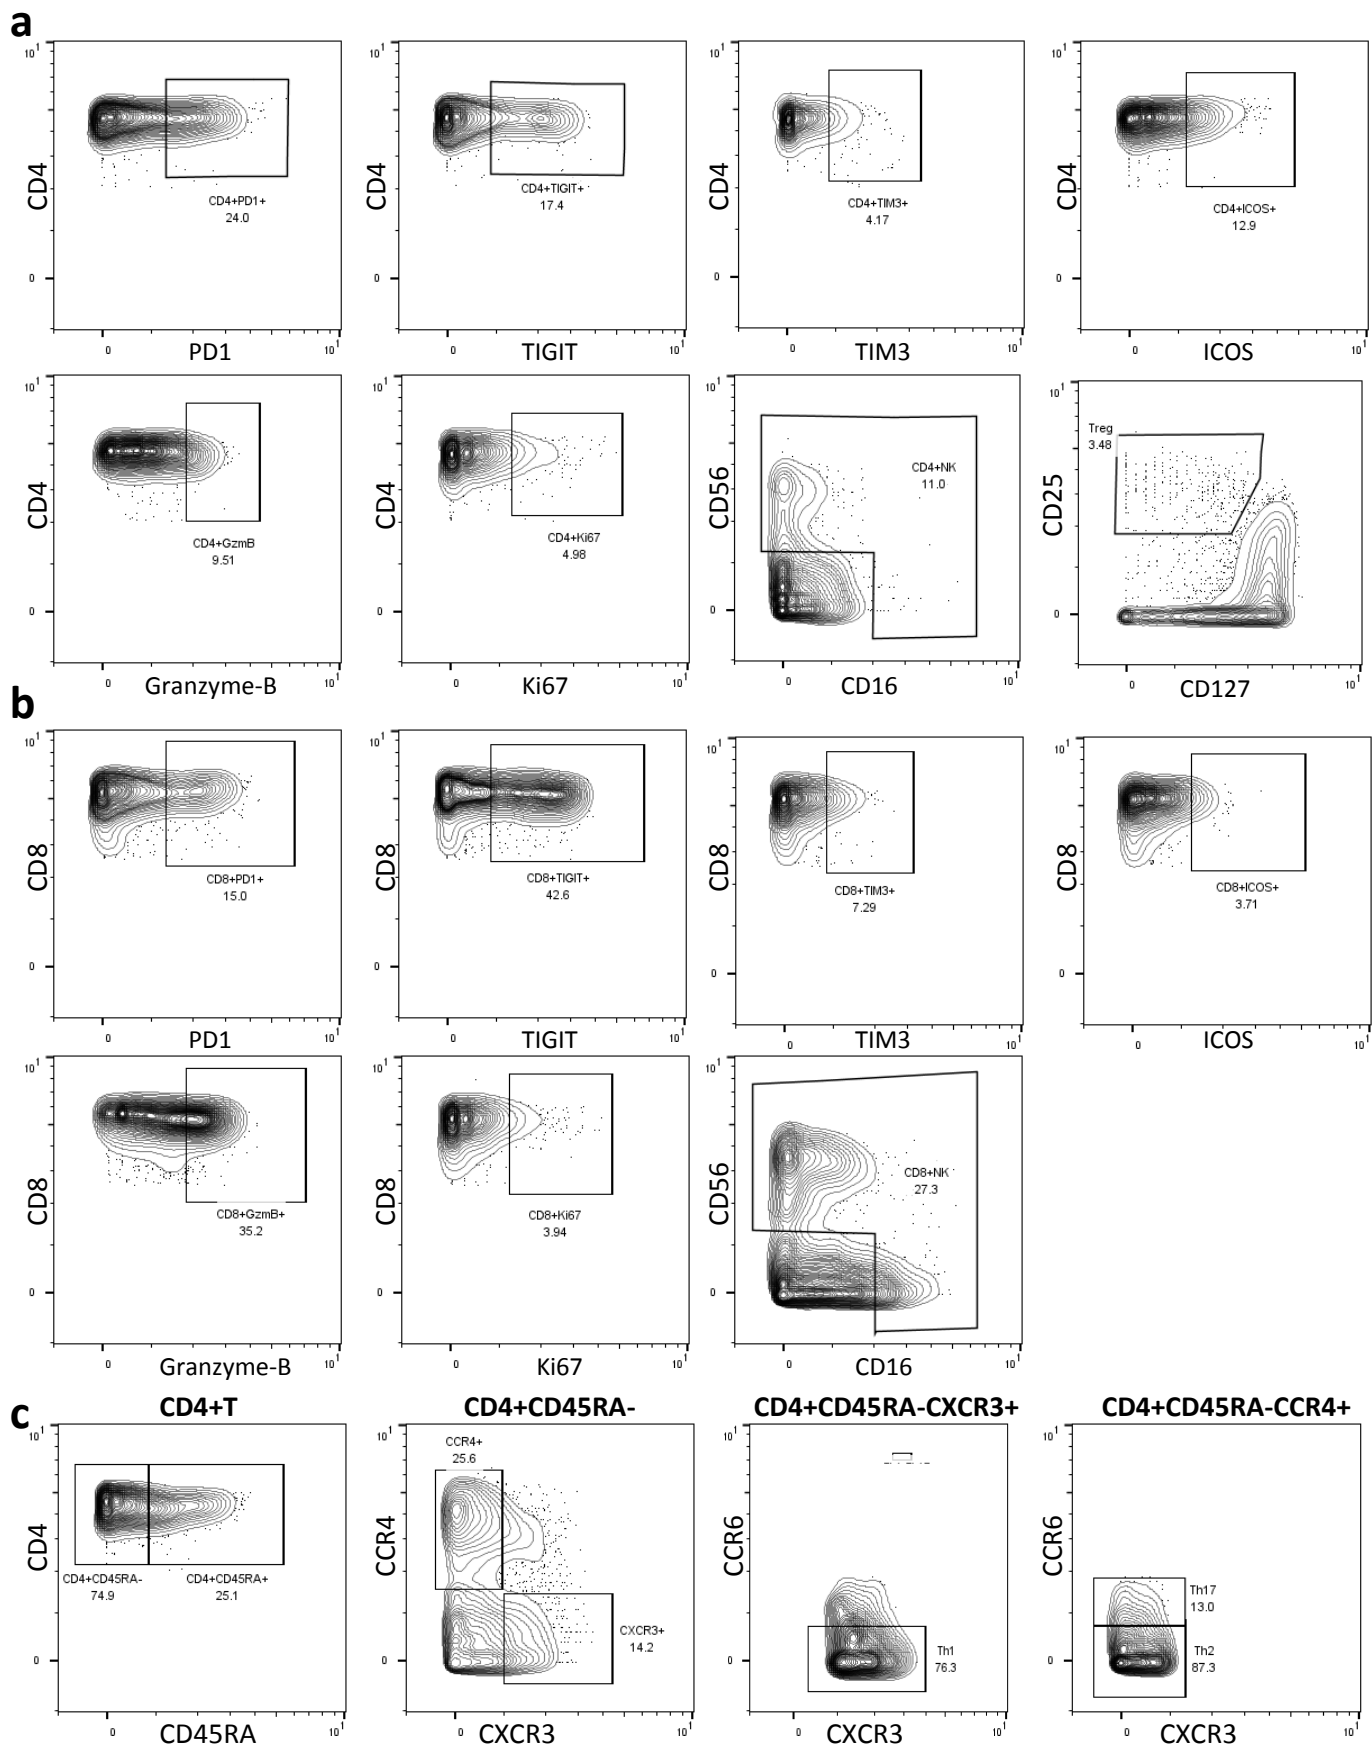

**Supplementary Figure 6.** Gating scheme for phenotypic and functional markers corresponding to figure 3 and regulatory T cells (Tregs) by mass cytometry. **(a)** Representative staining of PD1, TIGIT, TIM3, ICOS, Granzyme-B, Ki67, NKT and Treg markers on CD4+ T cells. **(b)** Representative staining of PD1, TIGIT, TIM3, ICOS, Granzyme-B, Ki67, and NKT markers on CD8+ T cells **(c)** Identification of Th subsets in CD4+ T cells. *Abbreviations:* NKT, natural killer T cells

■ HD  
■ Chemo-CDK-  
■ Previous Chemo/CDK (not last 3 months)  
■ Chemo (last 3 months)  
■ CDK (last 3 months)

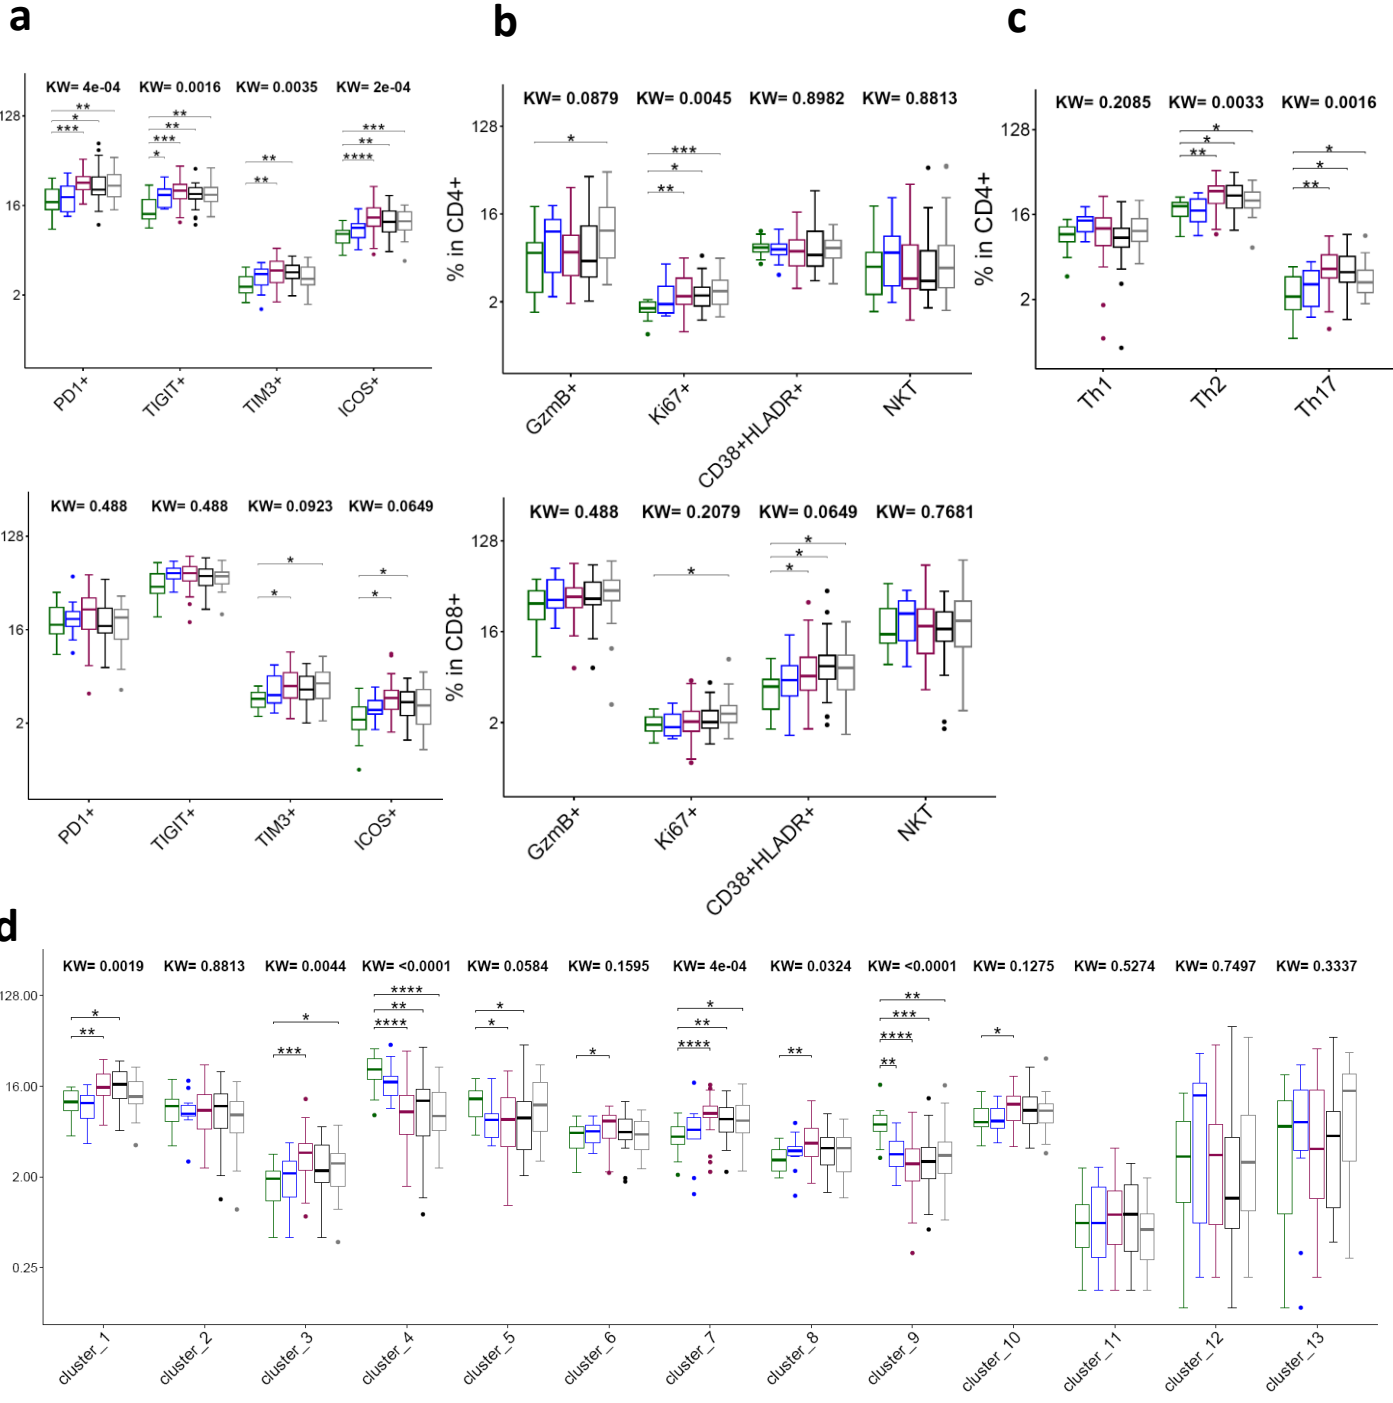

**Supplementary Figure 7.** Effect of previous chemotherapy and CDK inhibitors on phenotype of T cells in BC patients. Expression of immune checkpoint receptors **(a)** and functional/phenotypic markers **(b)** in CD4+ and CD8+ T cells. **(c)** Abundance of Th1/Th2/Th17 subsets in CD4+ T cells. **(d)** Abundance of CD4+ T cell clusters identified by phenograph. Received no chemotherapy/CDK inhibitors (Chemo-CDK-; n=10), received chemotherapy/CDK inhibitors >3 months before sample collection [Previous Chemo/CDK (not last 3 months); n=40], received chemotherapy within 3 months before sample collection [Chemo (last 3 months); n=26], received CDK inhibitors within 3 months before sample collection [CDK (last 3 months); n=28]. Groups were compared by kruskal wallis test, followed by pairwise comparisons using Wilcoxon Mann-Whitney Rank Sum Test with HD as a reference group. FDR-adjusted p-value (p.adj) < 0.05 was considered statistically significant. \*p.adj<0.05, \*\*p.adj<0.01, \*\*\*p.adj<0.001, \*\*\*\*p.adj<0.0001.

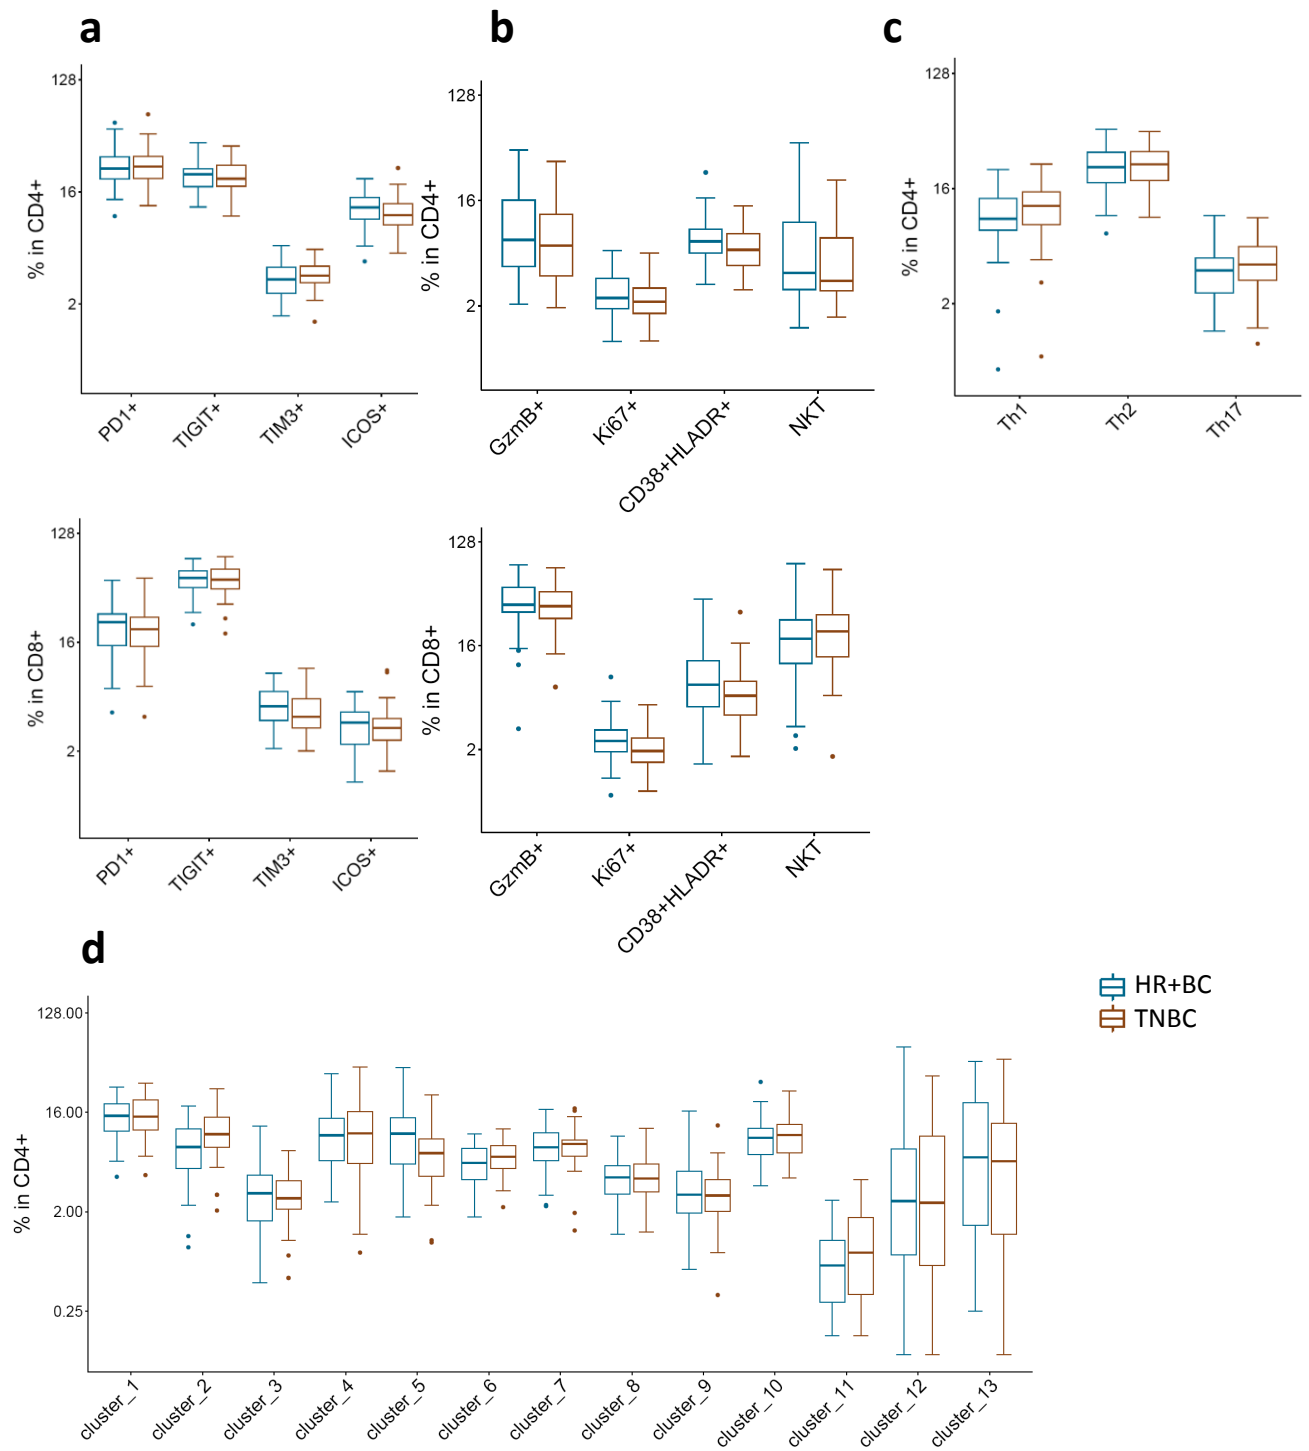

**Supplementary Figure 8.** Comparison of T cell phenotype between HR+BC and TNBC patients. Expression of immune checkpoint receptors **(a)** and functional/phenotypic markers **(b)** in CD4+ and CD8+ T cells. **(c)** Abundance of Th1/Th2/Th17 subsets in CD4+ T cells. **(d)** Comparative abundance of different CD4+ immune cell clusters as identified by phenograph on UMAP between HR+BC and TNBC patients. Groups were compared by Wilcoxon Mann-Whitney Rank Sum Test. FDR-adjusted p-value ( $p_{adj}$ ) < 0.05 was considered statistically significant. \* $p_{adj}$ <0.05, \*\* $p_{adj}$ <0.01. HR+BC: n=57. TNBC: n=47.

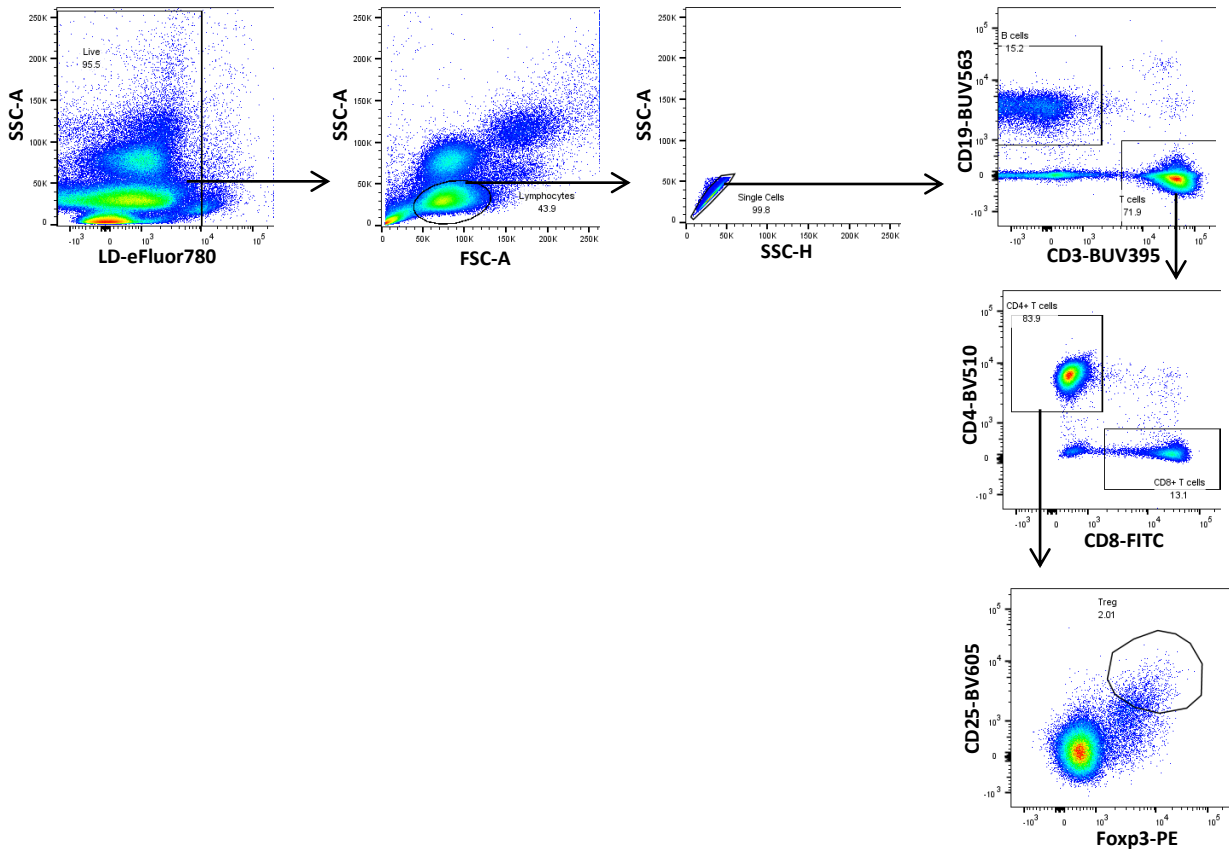

**Supplementary Figure 9.** Flow cytometry gating strategy for identifying regulatory T cells (Tregs) in PBMCs. Pseudocolor dot plots of PBMCs from a representative patient showing the gating strategy used to identify the Tregs by flow cytometry. Total PBMCs were gated using L/D (fixable viability dye eFluor780) and lymphocytes were identified by FSC-A and SSC-A and cell doublets were excluded based on SSC-A and SSC-H. Tregs were defined as CD3<sup>+</sup>CD4<sup>+</sup> CD25<sup>+</sup>Foxp3<sup>+</sup>.

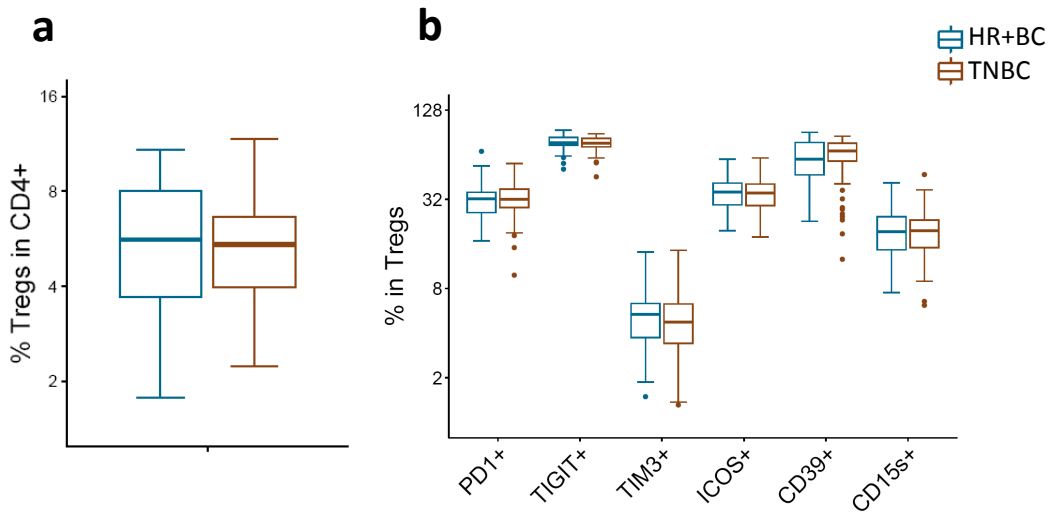

**Supplementary Figure 10.** Comparison of Treg phenotype between HR+BC and TNBC patients. **(a)** Abundance of Tregs (CD25+CD127-) in CD4 compartment in HR+BC and TNBC patients. **(b)** Expression of various immune checkpoints and functional markers on Tregs in HR+BC and TNBC patients. Two groups were compared by Wilcoxon Mann-Whitney Rank Sum Test. FDR-adjusted p-value ( $p_{adj}$ ) < 0.05 was considered statistically significant. \* $p_{adj}$ <0.05, \*\* $p_{adj}$ <0.01, \*\*\* $p_{adj}$ <0.001, \*\*\*\* $p_{adj}$ <0.0001. HR+BC: n=57. TNBC: n=47.

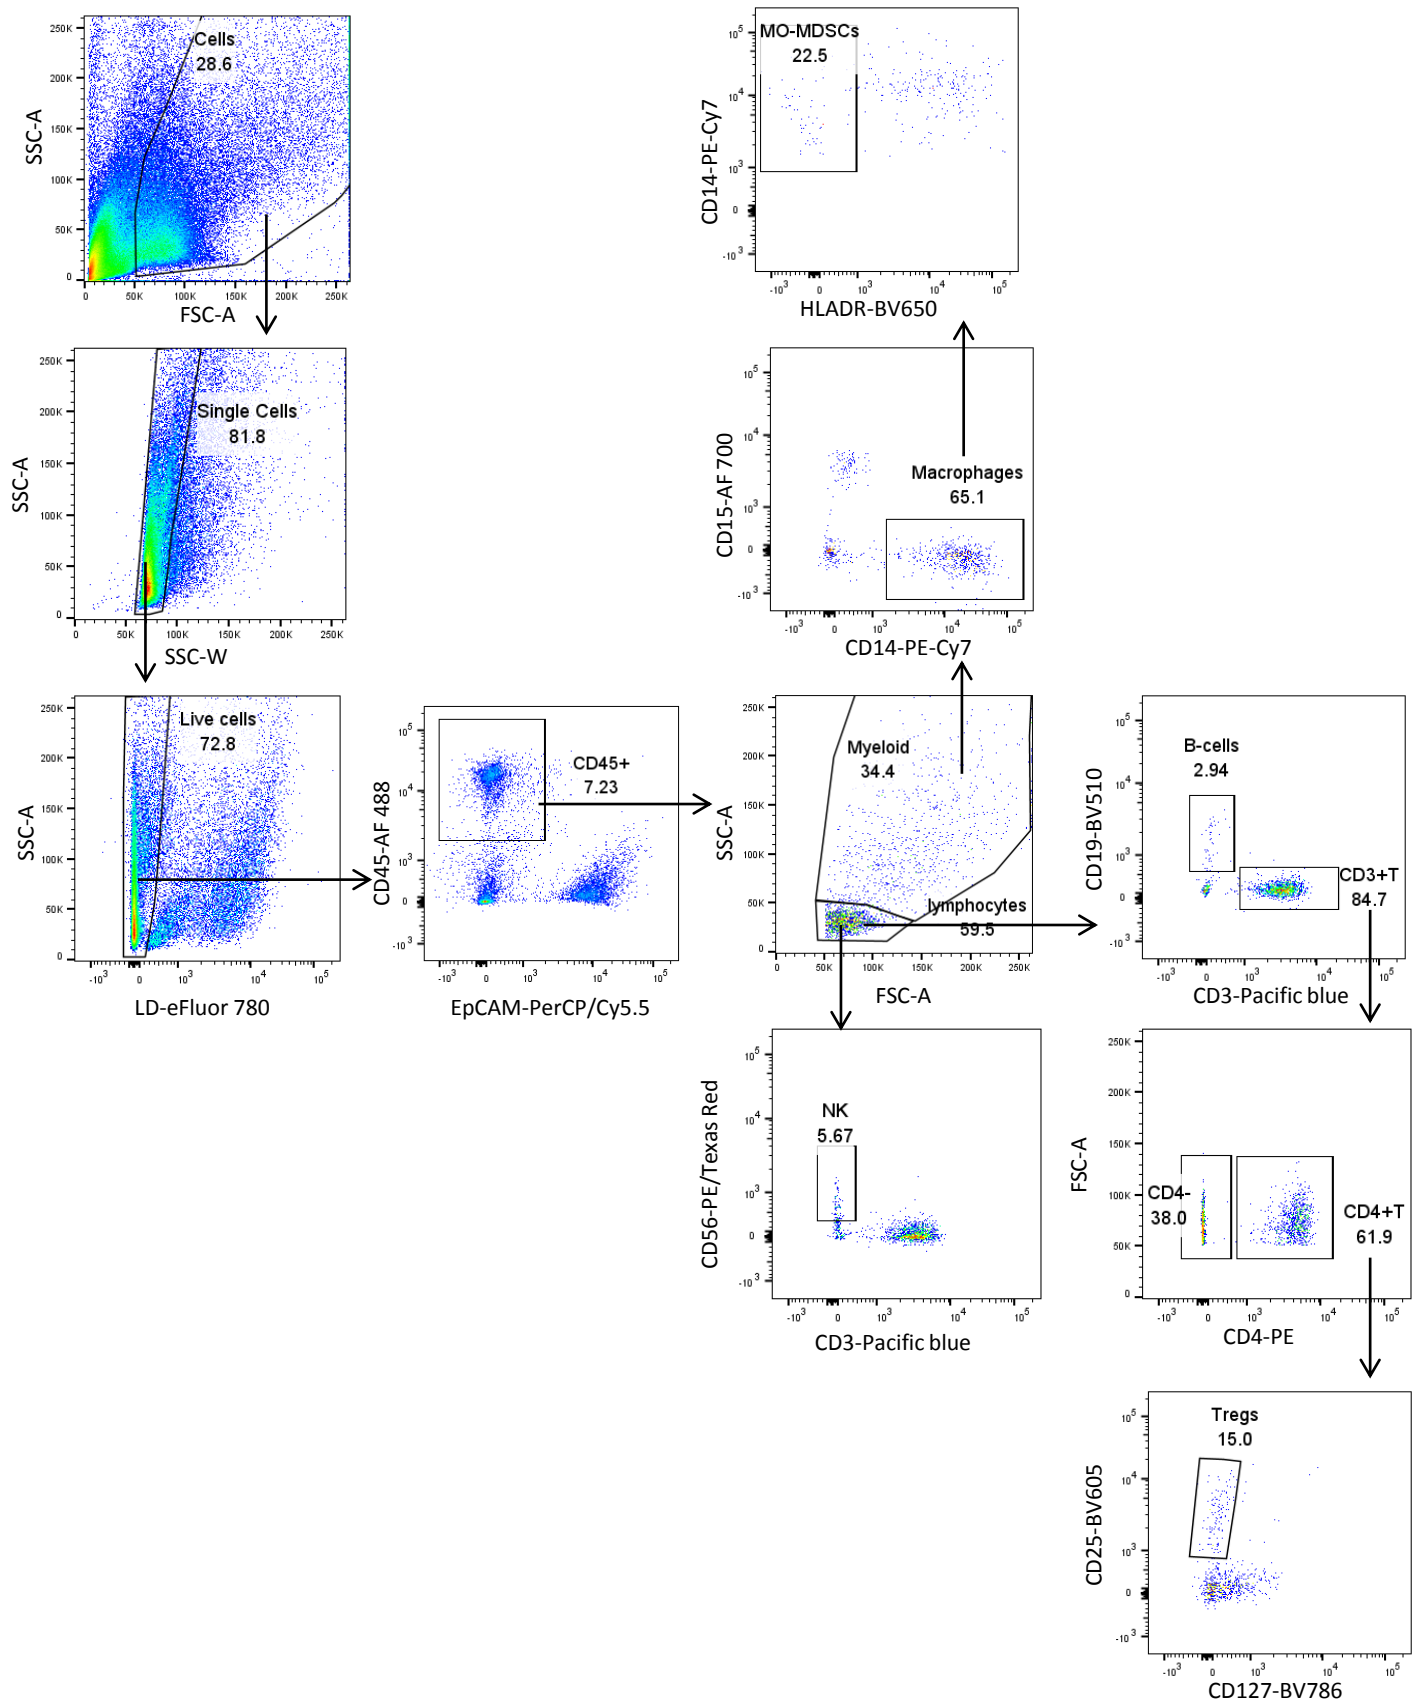

**Supplementary Figure 11.** Flow cytometry gating scheme for identifying immune cell subsets in tumor biopsies of metastatic breast cancer patients. Immune cell subsets are defined as follows: CD4+ T cells (CD3+CD4+CD8-), CD3+CD4- T cells (CD3+CD4-), Regulatory T cells (CD3+CD4+CD25+CD127-), B-cells (CD3-CD19+), NK cells (CD3-CD56+), Macrophages (CD14+CD15-) and Mo-MDSCs (CD14+HLADR-).
